# Supplementary material
Source: publisher figshare collection journal article supplement (https://gsajournals.figshare.com/articles/dataset/_/12746513)

## **Genome-wide RNAi screen for context-dependent tumor suppressors identified using *in vivo* models for neoplasia in *Drosophila***

Casper Groth<sup>1,2</sup>, Pooja Vaid<sup>1</sup>, Aditi Khatpe<sup>1</sup>, Nelchi Prashali<sup>1</sup>, Avantika Ahiya<sup>1</sup>, Diana Andrejeva<sup>2</sup>, Madhumita Chakladar<sup>1</sup>, Sanket Nagarkar<sup>1</sup>, Rachel Paul<sup>1</sup>, Teresa Eichenlaub<sup>2</sup>, Hector Herranz<sup>2</sup>, TS Sridhar<sup>3</sup>, Stephen M. Cohen<sup>2\*</sup> and LS Shashidhara<sup>1\*</sup>

### Addresses

(1) Indian Institute of Science Education and Research (IISER)  
Dr. Homi Bhabha Road, Pashan, Pune 411 008, INDIA

(2) Department of Cellular and Molecular Medicine, University of Copenhagen, Blegdamsvej 3,  
Copenhagen 2200N Denmark

(3) Division of Molecular Medicine, St Johns Research Institute, Bangalore, India

- Authors for correspondence

**Total 6 pages including this cover page**

## Supplemental data

### Figure S1: screen design and controls

(A) Transgenes used in the three screens: In Yki and EGFR screens, there were 5 transgenes involved including RNAi in the final larvae that were screened for phenotypes. In case of EGFR-SOCS screen, there were 6 transgenes in the final larvae that were screened for phenotypes. To facilitate fast, reliable and reproducible testing, we combined all transgenes (as shown below), except the VDRC KK RNAi line being tested, to produce stable stocks. These stocks were then crossed to the KK library of UAS-RNAi stocks (see methods for genotypes). The integrity of these stocks was verified weekly.

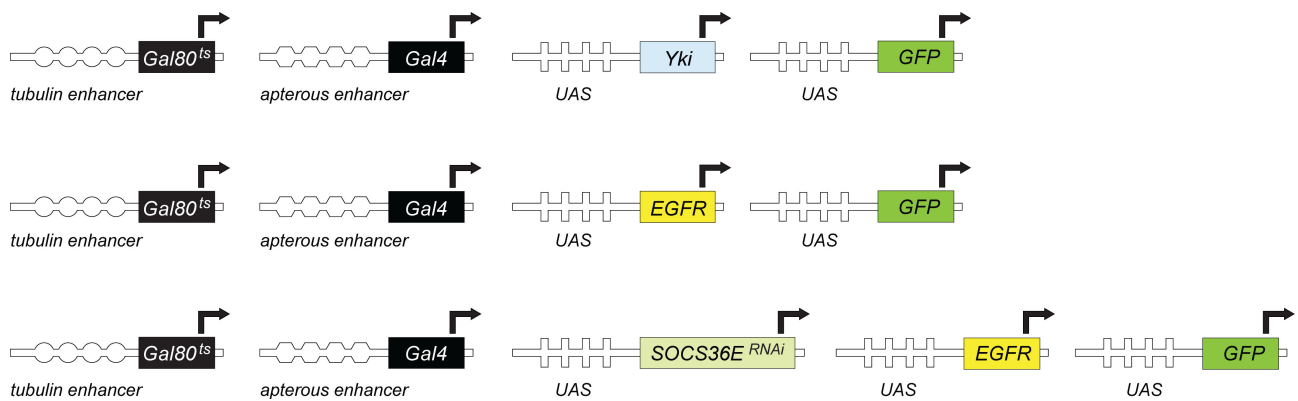

## (B) Screen workflow:

The figure illustrates how the screen was done. To ensure that the screen (which involved close to 30,000 crosses) is fast, reliable and reproducible, we strictly adhered to a predetermined schedule for all steps and temperature regimes. The schematic below shows when the virgins were collected, when the crosses were set up, when the larvae were shifted to higher temperature to induce GAL4 expression and when the larvae were scored for the phenotype. Each cycle took 21 days to complete.

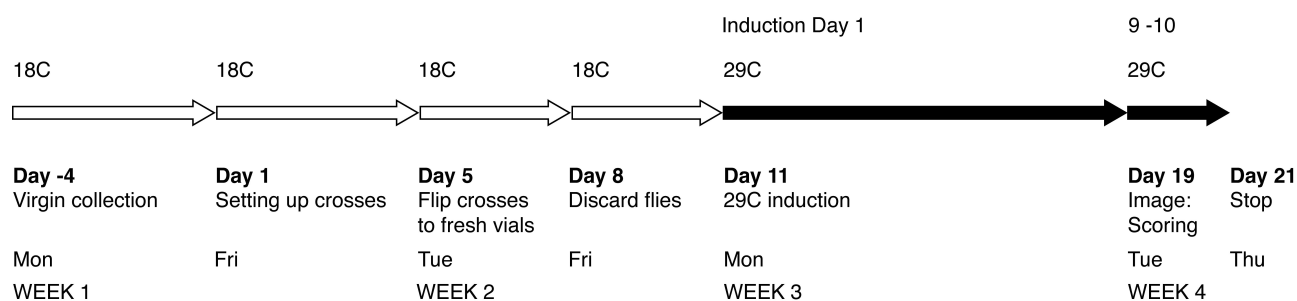

**Figure S2: Quality control. From Left to Right.**

Left: w; *ap*-Gal4; UAS-GFP + UAS-Yki, UAS-EGFR or UAS-EGFR+*SOCS36E*<sup>RNAi</sup> expression after 24h induction at 29°C. Center panel: same combinations after 8d at 29°C. This phenotype was tested on a weekly basis to control for the quality and integrity of the test stocks. Right panel: same combinations crossed to indicated RNAi lines as positive controls.

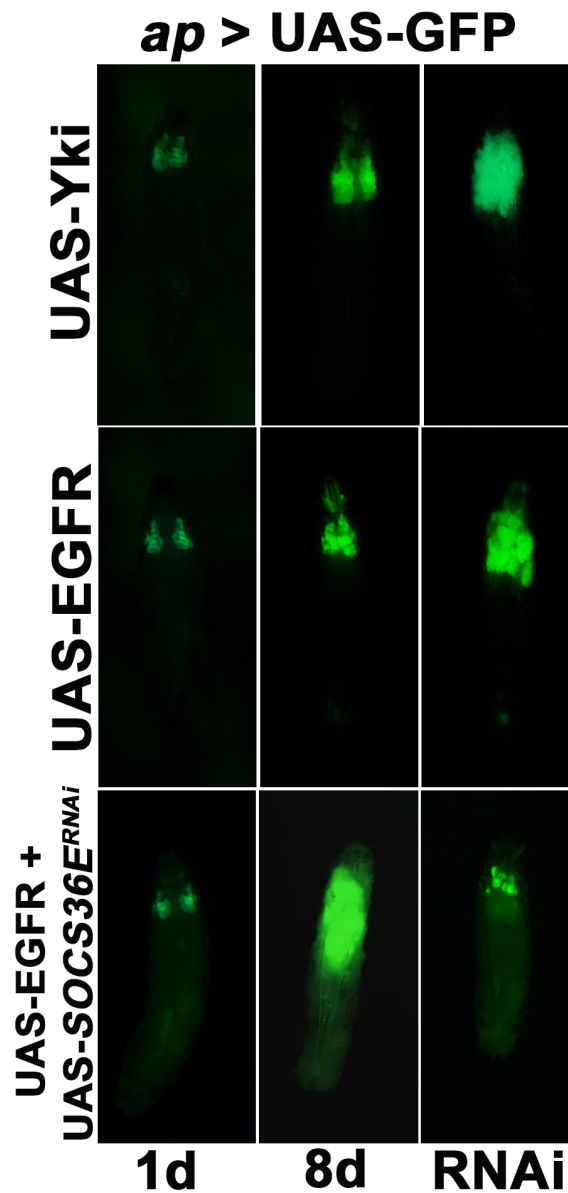



### Supplemental Table 1: Markers of neoplasia.

The table summarizes the results of immunohistochemistry to assess epithelial polarity using antibody to E-Cadherin and Rhodamine-phalloidin to assess apical adherens junctions and actin localization. Antibody to MMP1 was used to assess activation of the JNK pathway during neoplasia, as described (Herranz et al 2012, 10.1016/j.cub.2012.02.050).

| CG Number | Trans-ID | Positive in Yki/EGFR Screen | Gene Name                                 | Gene Symbol | IHC status     |                       |            |
|-----------|----------|-----------------------------|-------------------------------------------|-------------|----------------|-----------------------|------------|
|           |          |                             |                                           |             | MMP1 increased | Polarity perturbation |            |
|           |          |                             |                                           |             |                | D-cad                 | Phalloidin |
| CG18505   | 105745   | YKI                         | Acylphosphatase 2                         | Acyp2       | Negative       | Negative              | Positive   |
| CG32333   | 100303   | YKI                         | CG32333                                   |             | Negative       | Positive              | Positive   |
| CG14071   | 104291   | YKI                         | CG14071                                   |             | Positive       | Positive              | Positive   |
| CG12272   | 107954   | YKI                         | Strumpellin                               | Strumpellin | Positive       | Positive              | Negative   |
| CG42588   | 100428   | YKI                         | CG42588                                   |             | Positive       | Positive              | Negative   |
| CG15824   | 101232   | YKI                         | CG15824                                   |             | Negative       | Positive              | Negative   |
| CG12692   | 109683   | YKI                         | CG12692                                   |             | Negative       | Positive              | Positive   |
| CG5151    | 102455   | YKI                         | CG5151                                    |             | Negative       | Positive              | Positive   |
| CG5125    | 110702   | YKI                         | neither inactivation nor afterpotential C | ninaC       | Positive       | Positive              | Positive   |
| CG33346   | 100352   | YKI                         | CG33346                                   |             | Positive       | Positive              | Positive   |
| CG14966   | 100821   | YKI                         | CG14966                                   |             | Positive       | Positive              | Positive   |
| CG6947/CG | 100401   | YKI                         | CG43896                                   |             | Positive       | Positive              | Positive   |
| CG32548   | 104969   | YKI                         | CG32548                                   |             | Positive       | Negative              | Positive   |
| CG30421   | 103553   | YKI                         | Ubiquitin specific protease 15/31         | Usp15-31    | Negative       | Negative              | Positive   |
| CG9241    | 103568   | YKI                         | Minichromosome maintenance 10             | Mcm10       | Positive       | Positive              | Positive   |
| CG4109    | 107014   | YKI                         | Syntaxin 8                                | Syx8        | Negative       | Positive              | Positive   |
| CG6751    | 107563   | YKI                         | No Child Left Behind                      | NCLB        | Positive       | Positive              | Positive   |
| CG4008    | 110459   | YKI                         | uninitiated                               | und         | Positive       | Positive              | Positive   |
| CG8948    | 110812   | YKI                         | GTPase regulator associated with FAK      | Graf        | Positive       | Positive              | Positive   |
| CG5874    | 106245   | YKI                         | Negative elongation Factor A              | Nelf-A      | Positive       | Positive              | Positive   |
| CG10521   | 100840   | YKI                         | Netrin-B                                  | NetB        | Negative       | Negative              | Positive   |
| CG32816   | 100838   | YKI                         | CG32816                                   |             | Negative       | Negative              | Positive   |
| CG3352    | 108863   | EGFR                        | fat                                       | ft          | Negative       | Positive              | Positive   |
| CG31926   | 107437   | EGFR                        | CG31926                                   |             | Positive       | Positive              | Positive   |
| CG42857   | 103539   | EGFR                        | CG42857                                   |             | Positive       | Positive              | Positive   |

**Figure S3: Markers of neoplasia. Sample images.**

Control and experimental wing imaginal discs of genotypes as shown on the images were stained for F-actin using Phalloidin, E-Cadherin using anti-Cadherin antibodies and MMP1 using anti-MMP1 antibodies. Note disrupted and irregular organization of F-actin and E-Cadherin an indication of loss of apico-basal polarity and cell adhesion properties in neoplastic wing discs. Increased MMP1 in those discs is an indication of epithelial-mesenchymal transition.

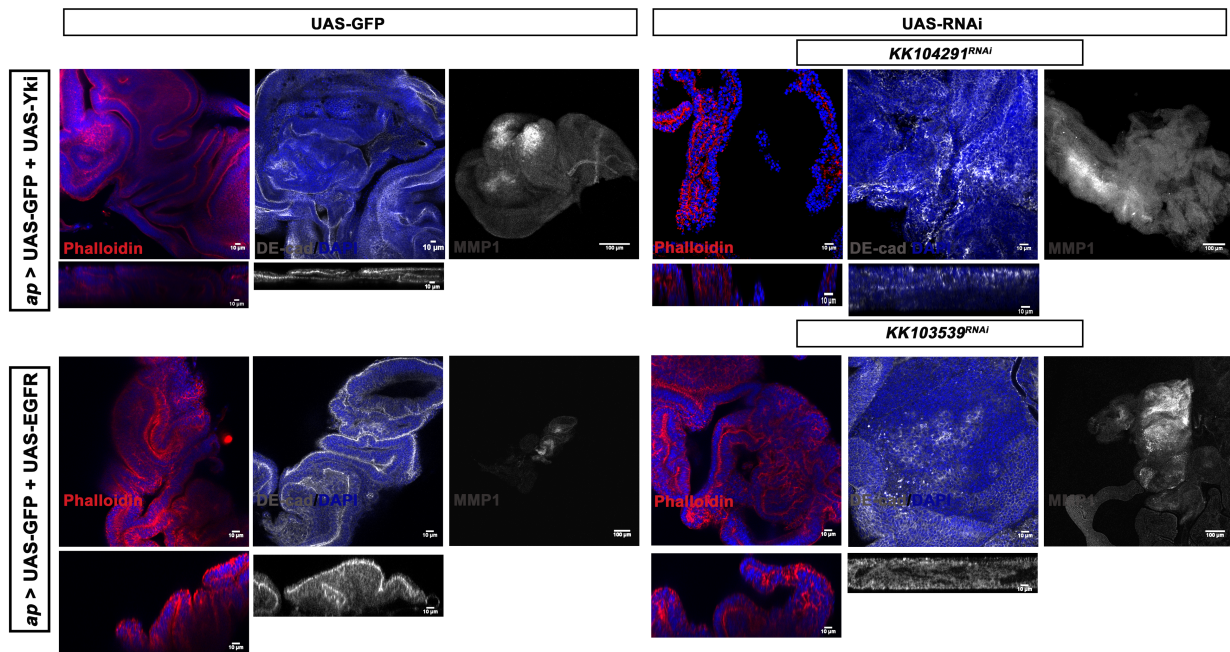

Supplement: Supplementary file 1 [file 1]
